# Supplementary material for: Preliminary Studies on Site Fidelity, Residence Index, and Population Size of Irrawaddy Dolphins in West Penang, Malaysia
Source: MDPI journal article supplement (doi:10.3390/oceans4040029), 2023-12-12
Supplement: s1 [file s1]

**Dolphin catalogue (LDF and RDF) of each Irrawaddy dolphin individual in west Penang Island**

| Individual name | Right dorsal fin (RDF)                                                               | Left dorsal fin (LDF)                                                               |
|-----------------|--------------------------------------------------------------------------------------|-------------------------------------------------------------------------------------|
| OBP003*         |    |  |
| OBP010*         |    | NA                                                                                  |
| OBP016*         |  |                                                                                     |

| Individual name | Right dorsal fin (RDF)                                                              | Left dorsal fin (LDF)                                                                |
|-----------------|-------------------------------------------------------------------------------------|--------------------------------------------------------------------------------------|
| OBP040          |   | NA                                                                                   |
| OBP041          |   |   |
| OBP042          |  |  |

| Individual name | Right dorsal fin (RDF)                                                                                                                                                                                                                                       | Left dorsal fin (LDF)                                                                                                                                                                                                                                       |
|-----------------|--------------------------------------------------------------------------------------------------------------------------------------------------------------------------------------------------------------------------------------------------------------|-------------------------------------------------------------------------------------------------------------------------------------------------------------------------------------------------------------------------------------------------------------|
| OBP043          |  A photograph showing the right dorsal fin of a whale breaching the surface of the water. The fin is dark and pointed, with a small, lighter-colored patch near the base.  | NA                                                                                                                                                                                                                                                          |
| OBP044          |  A photograph showing the right dorsal fin of a whale breaching the surface of the water. The fin is dark and pointed, with a small, lighter-colored patch near the base.  |  A photograph showing the left dorsal fin of a whale breaching the surface of the water. The fin is dark and pointed, with a small, lighter-colored patch near the base. |
| OBP045          |  A photograph showing the right dorsal fin of a whale breaching the surface of the water. The fin is dark and pointed, with a small, lighter-colored patch near the base. | NA                                                                                                                                                                                                                                                          |

| Individual name | Right dorsal fin (RDF)                                                               | Left dorsal fin (LDF)                                                               |
|-----------------|--------------------------------------------------------------------------------------|-------------------------------------------------------------------------------------|
| OBP046          |    |  |
| OBP047          |    |  |
| OBP048          |  | NA                                                                                  |

| Individual name | Right dorsal fin (RDF)                                                                                                                                                                                                                                                          | Left dorsal fin (LDF)                                                                                                                                                                                                                                                          |
|-----------------|---------------------------------------------------------------------------------------------------------------------------------------------------------------------------------------------------------------------------------------------------------------------------------|--------------------------------------------------------------------------------------------------------------------------------------------------------------------------------------------------------------------------------------------------------------------------------|
| OBP049          |  A photograph showing the right dorsal fin of a whale breaching the water's surface. The fin is dark and pointed, with a small white patch near the base. The water is slightly choppy.       | NA                                                                                                                                                                                                                                                                             |
| OBP050          |  A photograph showing the right dorsal fin of a whale breaching the water's surface. The fin is dark and curved, with a small white patch near the base. The water is calm.                   | NA                                                                                                                                                                                                                                                                             |
| OBP051          |  A photograph showing the right dorsal fin of a whale breaching the water's surface. The fin is dark and pointed, with a small white patch near the base. The water is greenish and choppy. |  A photograph showing the left dorsal fin of a whale breaching the water's surface. The fin is dark and pointed, with a small white patch near the base. The water is greenish and choppy. |

| Individual name | Right dorsal fin (RDF)                                                               | Left dorsal fin (LDF)                                                                |
|-----------------|--------------------------------------------------------------------------------------|--------------------------------------------------------------------------------------|
| OBP052          |    | NA                                                                                   |
| OBP053          |    |   |
| OBP054          |  |  |

| Individual name | Right dorsal fin (RDF)                                                              | Left dorsal fin (LDF)                                                               |
|-----------------|-------------------------------------------------------------------------------------|-------------------------------------------------------------------------------------|
| OBP055          | NA                                                                                  |  |
| OBP056          |   | NA                                                                                  |
| OBP057          |  | NA                                                                                  |

| Individual name | Right dorsal fin (RDF)                                                              | Left dorsal fin (LDF)                                                                |
|-----------------|-------------------------------------------------------------------------------------|--------------------------------------------------------------------------------------|
| OBP058          |   |   |
| OBP059          | NA                                                                                  |   |
| OBP060          |  |  |

| Individual name | Right dorsal fin (RDF)                                                               | Left dorsal fin (LDF)                                                               |
|-----------------|--------------------------------------------------------------------------------------|-------------------------------------------------------------------------------------|
| OBP061          |    |  |
| OBP062          |    |  |
| OBP063          |  | NA                                                                                  |

| Individual name | Right dorsal fin (RDF)                                                                                                                                                                                                                                                                               | Left dorsal fin (LDF)                                                                                                                                                                                                                                                                                |
|-----------------|------------------------------------------------------------------------------------------------------------------------------------------------------------------------------------------------------------------------------------------------------------------------------------------------------|------------------------------------------------------------------------------------------------------------------------------------------------------------------------------------------------------------------------------------------------------------------------------------------------------|
| OBP064          |  A photograph showing the right dorsal fin of a whale, OBP064, as it surfaces. The fin is dark and sleek, with a small blow visible just behind it. The water is greenish and has some white foam on the surface.  |  A photograph showing the left dorsal fin of a whale, OBP064, as it surfaces. The fin is dark and sleek, with a small blow visible just behind it. The water is greenish and has some white foam on the surface.  |
| OBP065          |  A photograph showing the right dorsal fin of a whale, OBP065, as it surfaces. The fin is dark and sleek, with a small blow visible just behind it. The water is greenish and has some white foam on the surface.  | NA                                                                                                                                                                                                                                                                                                   |
| OBP066          |  A photograph showing the right dorsal fin of a whale, OBP066, as it surfaces. The fin is dark and sleek, with a small blow visible just behind it. The water is greenish and has some white foam on the surface. |  A photograph showing the left dorsal fin of a whale, OBP066, as it surfaces. The fin is dark and sleek, with a small blow visible just behind it. The water is greenish and has some white foam on the surface. |

| Individual name | Right dorsal fin (RDF)                                                                                                                                                                                                           | Left dorsal fin (LDF)                                                                                                                                                                                                           |
|-----------------|----------------------------------------------------------------------------------------------------------------------------------------------------------------------------------------------------------------------------------|---------------------------------------------------------------------------------------------------------------------------------------------------------------------------------------------------------------------------------|
| OBP067          |  A photograph showing the right dorsal fin of a whale, which is a broad, triangular shape with a small, rounded tip, emerging from the water.  |  A photograph showing the left dorsal fin of a whale, which is a broad, triangular shape with a small, rounded tip, emerging from the water. |
| OBP068          |  A close-up photograph of the right dorsal fin of a whale, showing a dark, curved shape with a small, rounded tip, emerging from the water.    |  A photograph showing the left dorsal fin of a whale, which is a broad, triangular shape with a small, rounded tip, emerging from the water. |
| OBP069          |  A photograph showing the right dorsal fin of a whale, which is a broad, triangular shape with a small, rounded tip, emerging from the water. | NA                                                                                                                                                                                                                              |

| Individual name | Right dorsal fin (RDF)                                                              | Left dorsal fin (LDF)                                                               |
|-----------------|-------------------------------------------------------------------------------------|-------------------------------------------------------------------------------------|
| OBP070          |   |  |
| OBP071          |   |  |
| OBP072          |  | NA                                                                                  |

| Individual name | Right dorsal fin (RDF)                                                                                                                                                                                                          | Left dorsal fin (LDF) |
|-----------------|---------------------------------------------------------------------------------------------------------------------------------------------------------------------------------------------------------------------------------|-----------------------|
| OBP073          |  A close-up photograph of the right dorsal fin of a whale, showing its dark, rounded shape as it cuts through the water.                      | NA                    |
| OBP074          |  A photograph of the right dorsal fin of a whale, viewed from a slightly elevated angle, showing the fin's profile and the surrounding water. | NA                    |
| OBP075          |  A photograph of the right dorsal fin of a whale, showing a more complete view of the fin's shape and the water around it.                   | NA                    |
